# Supplementary material for: Lymphoid tissue phospholipase A2 group IID resolves contact hypersensitivity by driving antiinflammatory lipid mediators
Source: PubMed Central journal article supplement — J Exp Med. 2013 Jun 3;210(6):1217–34. doi: 10.1084/jem.20121887 (PMC3674707; doi:10.1084/jem.20121887), 2013-06-03
Supplement: supp_jem.20121887_JEM_20121887_sm.pdf [file supp_jem.20121887_JEM_20121887_sm.pdf]

SUPPLEMENTAL MATERIAL

Mike et al., <http://www.jem.org/cgi/content/full/jem.20121887/DC1>

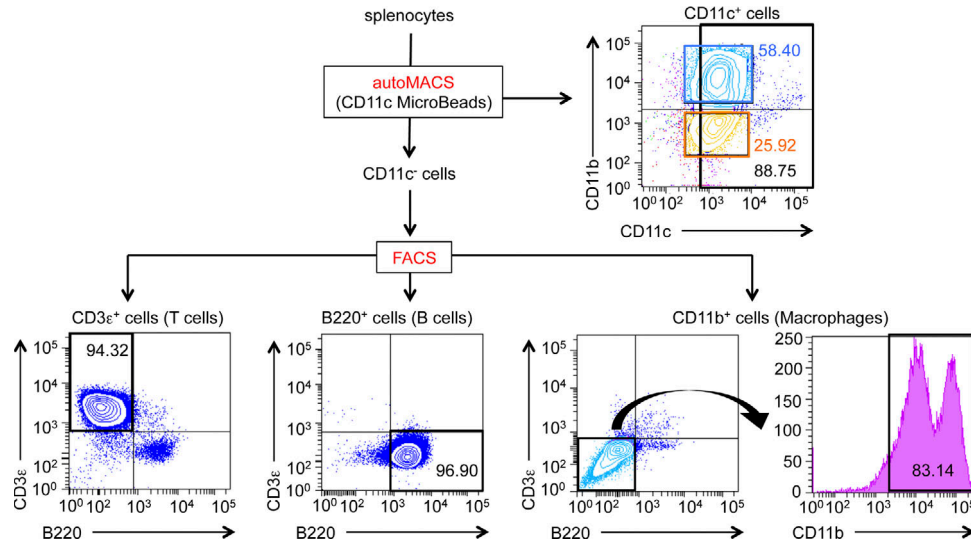

**Figure S1. Flow cytometry of mouse splenocytes.** Mouse splenocytes were separated into CD11c<sup>+</sup> and CD11c<sup>-</sup> populations by AutoMACS. CD11c<sup>-</sup> cells were further sorted into CD3ε<sup>+</sup> T cells, B220<sup>+</sup> B cells, and CD11b<sup>+</sup> macrophages. Purities of individual cell populations, which were used in Fig. 1 D, are indicated by boxes.

**Table S1. Serum biochemical parameters in *Pla2g2d<sup>+/+</sup>* and *Pla2g2d<sup>-/-</sup>* mice under normal housing conditions**

| Parameters               | Genotypes                    |                              | Units   |
|--------------------------|------------------------------|------------------------------|---------|
|                          | <i>Pla2g2d<sup>+/+</sup></i> | <i>Pla2g2d<sup>-/-</sup></i> |         |
| Alkaline phosphatase     | 135.3 ± 70.5                 | 105.8 ± 41.2                 | U/liter |
| Alanine aminotransferase | 30.9 ± 11.1                  | 24.5 ± 3.1                   | U/liter |
| Bilirubin                | 0.3 ± 0.1                    | 0.3 ± 0.1                    | mg/dl   |
| Albumin                  | 3.7 ± 0.5                    | 3.6 ± 0.4                    | mg/dl   |
| Nitrogen urea            | 28.5 ± 4.9                   | 29.5 ± 11.5                  | mg/dl   |
| Total cholesterol        | 77.4 ± 28.1                  | 83.0 ± 11.5                  | mg/dl   |

Male 15-wk-old *Pla2g2d<sup>+/+</sup>* and *Pla2g2d<sup>-/-</sup>* mice were anesthetized and blood samples were collected by cardiac puncture. Sera were applied to a clinical chemistry analyzer VetScan with V-DPP rotors (*n* = 8). Data are pooled results from two experiments. None of these parameters differed significantly between the genotypes.

**Table S2.** Circulating blood cells in *Pla2g2d<sup>+/+</sup>* and *Pla2g2d<sup>-/-</sup>* mice under normal housing conditions

| Cell populations | Genotypes                    |                              | Units                          |
|------------------|------------------------------|------------------------------|--------------------------------|
|                  | <i>Pla2g2d<sup>+/+</sup></i> | <i>Pla2g2d<sup>-/-</sup></i> |                                |
| Leukocytes       | 8.18 ± 1.11                  | 7.89 ± 1.40                  | x 10 <sup>9</sup> cells/liter  |
| Lymphocytes      | 7.02 ± 1.04                  | 6.47 ± 1.07                  | x 10 <sup>9</sup> cells/liter  |
| Granulocytes     | 0.76 ± 0.11                  | 0.96 ± 0.29                  | x 10 <sup>9</sup> cells/liter  |
| Monocytes        | 0.39 ± 0.15                  | 0.46 ± 0.18                  | x 10 <sup>9</sup> cells/liter  |
| Erythrocytes     | 9.97 ± 0.36                  | 9.98 ± 0.13                  | x 10 <sup>12</sup> cells/liter |
| Platelets        | 0.59 ± 0.04                  | 0.55 ± 0.04                  | x 10 <sup>12</sup> cells/liter |

Blood samples of 15-wk-old male *Pla2g2d<sup>+/+</sup>* and *Pla2g2d<sup>-/-</sup>* mice were collected from tail biopsy with 10 mM EDTA as an anti-coagulant. The samples were applied to the clinical blood cell analyzer VetScan HM to determine the numbers of circulating blood cells ( $n = 9$ ). Data are pooled results from two experiments. None of these parameters differed significantly between the genotypes.

**Table S3.** A list of primers used in quantitative RT-PCR

| Gene           | Accession number | Forward primer                                  | Reverse primer                  | Probe number (Roche) |
|----------------|------------------|-------------------------------------------------|---------------------------------|----------------------|
| <i>Ccl2</i>    | NM_011333.3      | 5'-CATCCACGTGTTGGCTCA-3'                        | 5'-GATCATCTGCTGGTGAATGAGT-3'    | 62                   |
| <i>Ccr2</i>    | NM_009915.2      | 5'-ACCTGTAATGCCATGCAAGT-3'                      | 5'-TGTCTTCCATTTCCTTTGATTG-3'    | 27                   |
| <i>Cd11b</i>   | NM_001082960.1   | 5'-CAATAGCCAGCCTCAGTGC-3'                       | 5'-GAGCCCAGGGGAGAAGT-3'         | 76                   |
| <i>Cd11c</i>   | NM_021334.2      | 5'-ATGGAGCCTCAAGACAGGAC-3'                      | 5'-GGATCTGGGATGCTGAAATC-3'      | 20                   |
| <i>Cd68</i>    | NM_009853.1      | 5'-GACCTACATCAGAGCCCGAGT-3'                     | 5'-CGCCATGAATGTCCACTG-3'        | 96                   |
| <i>Foxp3</i>   | NM_054039.1      | 5'-TCAGGAGCCACCAGTACA-3'                        | 5'-TCTGAAGGCAGAGTCAGGAGA-3'     | 78                   |
| <i>Gapdhs</i>  | NM_008085.1      | 5'-CCTTGAGATCAACACGTACCAG-3'                    | 5'-CGCCTGTACACTCCACCAC-3'       | 1                    |
| <i>Irfng</i>   | NM_008337.1      | 5'-ATCTGGAGGAACTGGCAAAA-3'                      | 5'-TTCAAGACTCAAAGAGTCTGAGGTA-3' | 21                   |
| <i>Il1b</i>    | NM_008361.3      | 5'-TGTAATGAAAGACGGCACACC-3'                     | 5'-TCTTCTTTGGGTATTGCTGG-3'      | 78                   |
| <i>Il6</i>     | NM_031168.1      | 5'-GCTACCAAACCTGGATATAATCAGGA-3'                | 5'-CCAGGTAGCTATGGTACTCCAGAA-3'  | 6                    |
| <i>Il10</i>    | NM_010548.1      | 5'-CAGAGCCACATGCTCCTAGA-3'                      | 5'-TGCCAGCTGGTCTTTGTT-3'        | 41                   |
| <i>Il12a</i>   | NM_008351.1      | 5'-ATCACAACCATCAGCAGATCA-3'                     | 5'-CGCCATTATGATTAGAGACTG-3'     | 49                   |
| <i>Pla2g2d</i> | NM_011109.1      | 5'-GCTCTGGGCTGGAACATGA-3'                       | 5'-CCTGGGTTGCAGTTATACCG-3'      | 66                   |
| <i>Pla2g5</i>  | NM_011110.2      | 5'-CTCACACTGGCTTGGTTCCT-3'                      | 5'-CATGGACTTGAGTTCTAGCAAGC-3'   | 95                   |
| <i>S100a9</i>  | NM_009114.2      | 5'-CACCTGAGCAAGAAGGAAT-3'                       | 5'-TGTCATTTATGAGGGCTTCATT-3'    | 31                   |
| <i>Tgfb1</i>   | NM_011577.1      | 5'-TGGAGCAACATGTGGAATC-3'                       | 5'-CAGCAGCCGGTTACCAAG-3'        | 72                   |
| <i>Tnf</i>     | NM_013693.1      | 5'-TCTTCTATTCTGCTTGTGG-3'                       | 5'-GGTCTGGCCATAGAACTGA-3'       | 49                   |
| <i>Rn18s</i>   | -                | 5'-TCGAGGCCCTGTAATTGGAA-3'                      | 5'-CCCTCAATGGATCCTCGTT-3'       | -                    |
| <i>Pla2g1b</i> |                  | Taq man probe (Applied Biosystems) No. 00478249 |                                 |                      |
| <i>Pla2g2d</i> |                  | Taq man probe (Applied Biosystems) No. 00478250 |                                 |                      |
| <i>Pla2g2e</i> |                  | Taq man probe (Applied Biosystems) No. 00478870 |                                 |                      |
| <i>Pla2g2f</i> |                  | Taq man probe (Applied Biosystems) No. 00478872 |                                 |                      |
| <i>Pla2g5</i>  |                  | Taq man probe (Applied Biosystems) No. 00448162 |                                 |                      |
| <i>Pla2g10</i> |                  | Taq man probe (Applied Biosystems) No. 00449532 |                                 |                      |

**Table S4.** A list of antibodies used in flow cytometry

| Molecule                  | Clone       | Ig subclass            | Fluorescent labeling                                       | Source                                             |
|---------------------------|-------------|------------------------|------------------------------------------------------------|----------------------------------------------------|
| CD3 $\epsilon$            | 145-2C11    | Hamster IgG            | Alexa Fluor 488<br>APC<br>FITC                             | BioLegend<br>eBioscience<br>BioLegend              |
| CD4                       | GK1.5       | Rat IgG2b              | phycoerythrin                                              | BioLegend                                          |
| CD8 $\alpha$              | 53-6.7      | Rat IgG2a              | Alexa Fluor 647                                            | BioLegend                                          |
| CD11b                     | M1/70       | Rat IgG2b              | FITC<br>phycoerythrin                                      | BioLegend<br>BioLegend                             |
| CD11c                     | N418        | Hamster IgG            | Alexa Fluor 700<br>Biotin<br>Pacific blue<br>phycoerythrin | BioLegend<br>BioLegend<br>BioLegend<br>eBioscience |
| CD16/32                   | 2.4G2<br>93 | Rat IgG2b<br>Rat IgG2a | -<br>-                                                     | BD<br>BioLegend                                    |
| CD25                      | PC61        | Rat IgG1               | Alexa Fluor 488                                            | BioLegend                                          |
| CD44                      | IM7         | Rat IgG2b              | phycoerythrin                                              | BD                                                 |
| CD45R/B220                | RA3-6B2     | Rat IgG2a              | Alexa Fluor 647                                            | BD                                                 |
| CD62L                     | MEL-14      | Rat IgG2a              | APC                                                        | BioLegend                                          |
| CD80                      | 16-10A1     | Hamster IgG            | APC                                                        | BioLegend                                          |
| CD86                      | GL-1        | Rat IgG2a              | Biotin                                                     | BioLegend                                          |
| FOXP3                     | FJK-16s     | Rat IgG2a              | Biotin                                                     | eBioscience                                        |
| MHC class II              | M5/114.15.2 | Rat IgG2b              | FITC                                                       | BioLegend                                          |
| Streptavidin <sup>a</sup> | -           | -                      | FITC<br>PE/Cy7                                             | eBioscience<br>BioLegend                           |

<sup>a</sup>Used in combination with biotin-labeled antibodies.
